# Supplementary material
Source: HighWire-hosted journal article supplement (https://clincancerres.aacrjournals.org/content/suppl/2014/01/07/19.24.6696)
Supplement: tab1-2.pdf [file tab1-2.pdf]

**Supplementary Table S1. 52 Melanomas from Various Institutions Genotyped by FoundationOne™**

|                           | Sample Information    |        |     |       |                       |                                            | Commonly Mutated Genes |      |     |       |       |
|---------------------------|-----------------------|--------|-----|-------|-----------------------|--------------------------------------------|------------------------|------|-----|-------|-------|
|                           | Name                  | Gender | Age | Stage | Site<br>(if not skin) | Median<br>Sequencing<br>Depth <sup>a</sup> | BRAF                   | NRAS | KIT | GNAQ  | GNA11 |
| Driver-Positive Melanomas | FM-Mel1               | M      | 46  | IV    |                       | 589                                        | V600E                  | Q61L |     |       |       |
|                           | FM-Mel2               | M      | 85  | IV    |                       | 1012                                       | V600E                  |      |     |       |       |
|                           | FM-Mel3               | F      | 51  | III   |                       | 1155                                       | V600E                  |      |     |       |       |
|                           | FM-Mel4               | M      | 48  | IV    |                       | 1341                                       | V600E                  |      |     |       |       |
|                           | FM-Mel5               | F      | 43  | IV    |                       | 1550                                       | V600E                  |      |     |       |       |
|                           | FM-Mel6               | M      | 62  | III   |                       | 1833                                       | V600E                  |      |     |       |       |
|                           | FM-Mel7               | F      | 74  | III   |                       | 1102                                       | V600K                  |      |     |       |       |
|                           | FM-Mel8               | M      | 56  | IV    |                       | 1255                                       | V600K                  |      |     |       |       |
|                           | FM-Mel9               | F      | 35  | IV    |                       | 1360                                       |                        | Q61K |     |       |       |
|                           | FM-Mel10              | M      | 83  | IV    |                       | 1684                                       |                        | Q61K |     |       |       |
|                           | FM-Mel11              | F      | 76  | III   |                       | 1054                                       |                        | Q61L |     |       |       |
|                           | FM-Mel12              | M      | 65  | III   |                       | 1623                                       |                        | Q61L |     |       |       |
|                           | FM-Mel13              | M      | 56  | IV    |                       | 1276                                       |                        | Q61R |     |       |       |
|                           | FM-Mel14              | M      | 71  | IV    |                       | 1012                                       |                        | Q61R |     |       |       |
|                           | FM-Mel15              | M      | 42  | IV    |                       | 924                                        |                        | Q61R |     |       |       |
|                           | FM-Mel16              | F      | 71  | n/a   |                       | 1445                                       |                        | Q61R |     |       |       |
|                           | FM-Mel17              | F      | 57  | IV    |                       | 673                                        |                        | Q61R |     |       |       |
|                           | FM-Mel18              | M      | 65  | IV    | Uveal/Ocular          | 956                                        |                        |      |     | Q209P |       |
|                           | FM-Mel19              | M      | 40  | IV    | Uveal/Ocular          | 1703                                       |                        |      |     | Q209P |       |
|                           | FM-Mel20              | M      | 71  | IV    |                       | 743                                        |                        |      |     |       | Q209L |
|                           | FM-Mel21              | F      | 44  | IV    | Uveal/CNS             | 808                                        |                        |      |     |       | Q209L |
|                           | FM-Mel22              | F      | 32  | IV    |                       | 1416                                       | D594N                  |      |     |       |       |
|                           | FM-Mel23              | M      | 78  | IV    |                       | 1809                                       | G469S                  |      |     |       |       |
|                           | FM-Mel24              | M      | 63  | IV    |                       | 1104                                       | G469V                  |      |     |       |       |
|                           | FM-Mel25              | F      | 55  | IV    |                       | 1023                                       | K601E/amp              |      |     |       |       |
|                           | FM-Mel26              | M      | n/a | III   |                       | 872                                        | L597Q                  |      |     |       |       |
|                           | FM-Mel27              | M      | 71  | IV    |                       | 1602                                       | L597R                  |      |     |       |       |
|                           | FM-Mel28              | M      | 83  | IV    |                       | 1779                                       | T599_V600insT          |      |     |       |       |
| Pan-Negative Melanomas    | FM-Mel29              | F      | 59  | IV    |                       | 775                                        | TRIM24-BRAF            |      |     |       |       |
|                           | FM-Mel30 <sup>b</sup> | F      | 27  | III   |                       | 1207                                       | PAPSS1-BRAF            |      |     |       |       |
|                           | FM-Mel31              | n/a    | n/a | n/a   |                       | 1417                                       |                        |      |     |       |       |
|                           | FM-Mel32              | F      | 54  | IV    |                       | 1568                                       |                        |      |     |       |       |
|                           | FM-Mel33              | M      | n/a | IV    |                       | 1116                                       |                        |      |     |       |       |

|                               |                       |    |    |              |      |      |  |  |  |  |  |
|-------------------------------|-----------------------|----|----|--------------|------|------|--|--|--|--|--|
| <b>Pan-Negative Melanomas</b> | FM-Mel34              | M  | 73 | IV           |      | 1232 |  |  |  |  |  |
|                               | FM-Mel35              | F  | 50 | IV           |      | 961  |  |  |  |  |  |
|                               | FM-Mel36              | M  | 62 | IV           |      | 1240 |  |  |  |  |  |
|                               | FM-Mel37              | M  | 54 | IV           |      | 1032 |  |  |  |  |  |
|                               | FM-Mel38              | F  | 44 | IV           |      | 1477 |  |  |  |  |  |
|                               | FM-Mel39 <sup>b</sup> | F  | 22 | n/a          |      | 1364 |  |  |  |  |  |
|                               | FM-Mel40              | F  | 68 | IV           |      | 793  |  |  |  |  |  |
|                               | FM-Mel41              | F  | 41 | IV           |      | 1547 |  |  |  |  |  |
|                               | FM-Mel42              | M  | 46 | III          |      | 220  |  |  |  |  |  |
|                               | FM-Mel43              | F  | 54 | IV           |      | 966  |  |  |  |  |  |
|                               | FM-Mel44              | F  | 70 | III          |      | 254  |  |  |  |  |  |
|                               | FM-Mel45              | F  | 55 | IV           |      | 1196 |  |  |  |  |  |
|                               | FM-Mel46              | M  | 52 | IV           |      | 1342 |  |  |  |  |  |
|                               | FM-Mel47              | M  | 44 | IV           |      | 1665 |  |  |  |  |  |
|                               | FM-Mel48              | M  | 61 | IV           | Anal | 1128 |  |  |  |  |  |
|                               | FM-Mel49              | F  | 50 | IV           |      | 1463 |  |  |  |  |  |
|                               | FM-Mel50              | M  | 38 | IV           |      | 1396 |  |  |  |  |  |
|                               | FM-Mel51              | F  | 67 | IV           |      | 807  |  |  |  |  |  |
| FM-Mel52 <sup>b</sup>         | M                     | 58 | IV | Uveal/Ocular | 1226 |      |  |  |  |  |  |

<sup>a</sup>Median Sequencing Depth refers to the median number of unique reads covering each base in the targeted genomic regions.

<sup>b</sup>Cases from Vanderbilt-Ingram Cancer Center

n/a – not available

**Supplementary Table S2. Cloning Primers**

| <b>Primer Name:</b>   | <b># Bases:</b> | <b>Sequences (5'--&gt;3')</b>                                             |
|-----------------------|-----------------|---------------------------------------------------------------------------|
| EcoRI-PAPSS1_Fwd      | 45              | GCCGCCGAATTCGCGCCACCATGGAGATCCCCGGGAGCCTGTGC                              |
| EcoRI_PAPSS1_Rev      | 37              | CGGCGGGAATTCCTAAGCTTTCTCCAAGGATTTGTAG                                     |
| EcoRI-PAPSS1_FLAG_Rev | 72              | CGGCGGGAATTCCTACTTGTTCATCGTCGTCCTTGTAGTCAGCTTTCTCCAAGGATTTGTAGTATTCTGTCAG |
| PAPSS1-BRAF_Fwd       | 45              | CTTCTACAGGAACGGGACTTGATTAGAGACCAAGGATTTTCGTGGT                            |
| PAPSS1-BRAF_Rev       | 45              | GTCTCTAATCAAGTCCCGTTCCTGTAGAAGTTCCACAATTGCTG                              |
| EcoRI-BRAF_Rev        | 40              | CGGCGGGAATTCCTCACTTGTTCATCGTCGTCCTTGTAGTCG                                |
| NheI-TRIM24_Fwd       | 45              | GCCGCCGCTAGCGCCGCCACCATGGAGGTGGCGGTGGAGAAGGCG                             |
| TRIM24-BRAF_Fwd       | 45              | TCCATCTCTCATCAGGACTTGATTAGAGACCAAGGATTTTCGTGGT                            |
| TRIM24-BRAF_Rev       | 45              | GTCTCTAATCAAGTCTGATGAGAGATGGAAGGTTGCTGGATGGG                              |
| NotI-BRAF_Rev         | 42              | CGGCGGGCGGCCGCTCACTTGTTCATCGTCGTCCTTGTAGTCG                               |

Text Color Code:

Black = Restriction enzyme "landing pad"

Purple = Restriction enzyme sequence

Red = *PAPSS1* sequence

Blue = *BRAF* sequence

Green = Kozak or FLAG sequence

Orange = *TRIM24* sequence
